# Supplementary material for: Is the delivery of a quality improvement education programme in obstetrics and gynaecology for final year medical students feasible and still effective in a shortened time frame?
Source: PubMed Central journal article supplement (PMC5446706; doi:10.1186/s12909-017-0927-y), 2017-05-26
Supplement: 12909_2017_927_MOESM1_ESM.pdf [file 12909_2017_927_MOESM1_ESM.pdf]

## Topic Selection Form for Quality Improvement Project

### Part A Student details

Names \_\_\_\_\_

Hospital \_\_\_\_\_ Contact email \_\_\_\_\_

We confirm that we will adhere to University and DHB policies around patient confidentiality and privacy. Any data saved on student hard drives or data sticks will be protected for the duration of the project and deleted at the end of the project.

\_\_\_\_\_  
Signatures

\_\_\_\_\_  
Date

### Part B Project details

Audit topic/question \_\_\_\_\_  
\_\_\_\_\_

The Standard \_\_\_\_\_

Sample size \_\_\_\_\_

Variables \_\_\_\_\_

Inclusion criteria \_\_\_\_\_

Exclusion criteria \_\_\_\_\_

### Part C Clinical Supervisor details

Name \_\_\_\_\_

Email \_\_\_\_\_

**Please submit form to your Supervisor by first Friday of the attachment. Visit the CECIL 'O & G attachment' page to access resources to assist you to complete your project**

#### FOR SUPERVISOR USE ONLY

- I confirm this topic would be suitable and appropriate for the QI project
- This topic would be suitable and appropriate with the following modifications:
  - 
  - 
  -

\_\_\_\_\_  
Name

\_\_\_\_\_  
Signature

\_\_\_\_\_  
Date

**Please return completed form to student by Tuesday of second week of attachment**
